# Supplementary material for: A novel FLI1 exonic circular RNA promotes metastasis in breast cancer by coordinately regulating TET1 and DNMT1
Source: PubMed Central journal article supplement (PMC6290540; doi:10.1186/s13059-018-1594-y), 2018-12-11
Supplement: 13059_2018_1594_MOESM1_ESM.pdf [file 13059_2018_1594_MOESM1_ESM.pdf]

### A. *FLI1* and metastasis

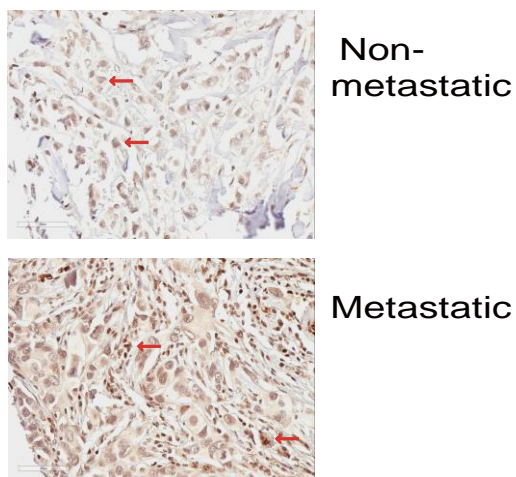

### B. *FLI1* score

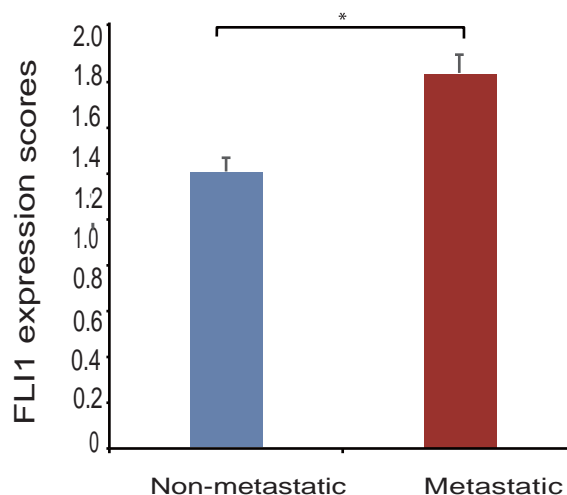

### C. *FLI1* and stages

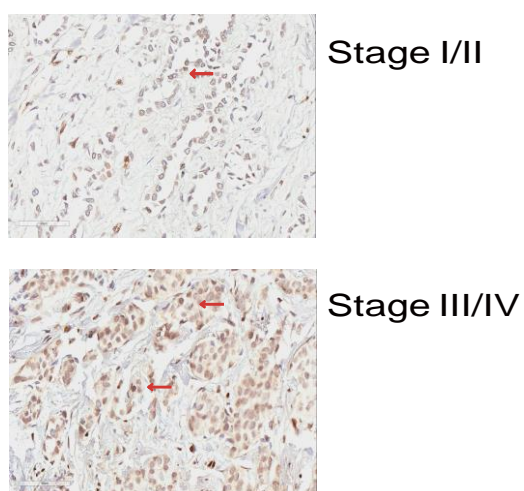

### D. *FLI1* score

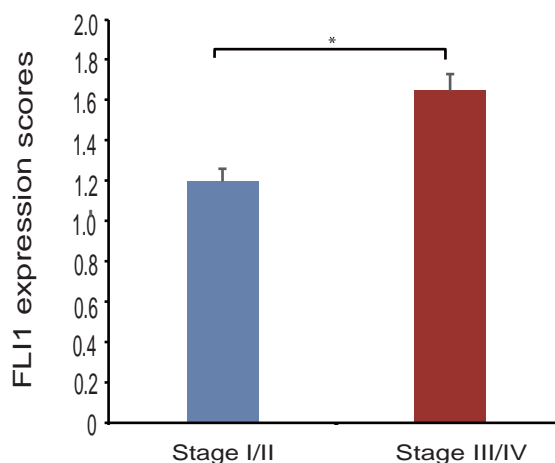

## Figure S1. *FLI1* overexpression in metastatic breast cancer tissues.

- Overexpressed *FLI1* in metastatic breast cancers. *FLI1* oncoprotein was quantitated by immunohistochemical staining and was evaluated as the expression score. Red arrow: dark brown immunohistochemical staining of *FLI1* oncoprotein.
- Quantitation of the *FLI1* oncoprotein score between the metastatic and non-metastatic breast cancer tissues. \*  $p < 0.05$  between the two groups.
- High expression of *FLI1* in advanced stage of breast cancer. Red arrow: dark brown immunohistochemical staining of *FLI1* oncoprotein.
- Quantitation of the *FLI1* oncoprotein score in patients with advanced stage of breast cancer. \*  $p < 0.05$  between the two groups.



### A. FECR1 V1

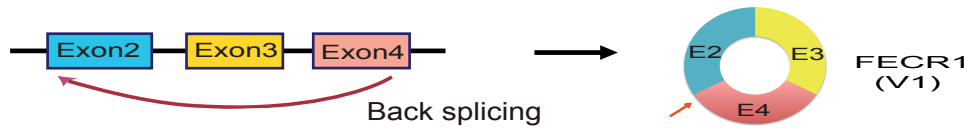

### B. V1 sequence (exons 4-2-3)

ACCCCACACTGTGGACACAGGAGCATGTGAGGCAATGGCTGGAGTGGGCC Exon 4  
 ATAAAGGAGTACAGCTTGATGGAGATCGACACATCCTTTTTCCAGAACAT  
 GGATGGCAAGGAAGTGTGTAATAATGAACAAGGAGGACTTCCTCCGCGCCA  
 CCACCCTCTACAACACGGAAGTGCTGTTGTCACACCTCAGTTACCTCAGG JH2532  
 GAAAG**GR**GGCTCTGTTCGGTGGTGGAGCGACGACCAGTCCCTCTTTGACTCA Exon 2  
 GCGTACGGAGCGGCAGCCCATCTCCCAAGGCCGACATGACTGCCTCGGG  
 JH3273 GAGTCTGACTACGGGCAGCCCCACAAGATCAACCCCTCCCACCACAGC  
 AGGAGTGGATCAATCAGCCAGTGAGGGTCAACGTCAAGCGGGAGTATGAC  
 CACATGAATGGATCCA**GGG**AGTCTCCGGTGGACTGCAGCGTTAGCAAATG Exon 3  
 CAGCAAGCTGGTGGGCGGAGGCGAGTCCAACCCCATGAACTACAACAGCT  
 ATATGGACGAGAAGAATGGCCCCCTCCTCCCAACATGACCACCAACGAG  
 AGGAGAGTCATCGTCCCCGCAG

### C. FECR1 V2

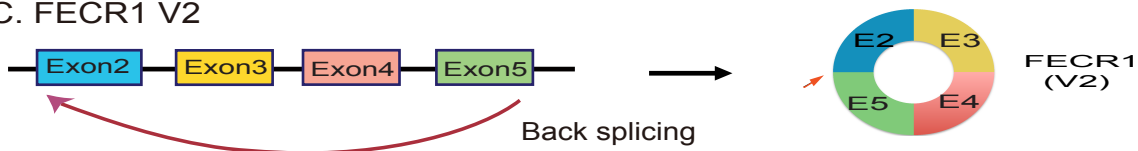

### D. V2 sequence (exons 5-2-3-4)

JH3311 TTCACTGCTGGCCTATAATAACAACCTCCACACCGACCAATCCTCACGAT EXON 5  
 TGAGTGTCAAAGAA**GR**GGCTCTGTTCGGTGGTGGAGCGACGACCAGTCCCT EXON 2  
 CTTTGA<sup>↑</sup>CTCAGCGTACGGAGCGGCAGCCCATCTCCCAAGGCCGACATGA  
 JH3273 CTGCCTCGGGGAGTCTGACTACGGGCAGCCCCACAAGATCAACCCCTC  
 CCACCACAGCAGGAGTGGATCAATCAGCCAGTGAGGGTCAACGTCAAGCG  
 GGAGTATGACCACATGAATGGATCCA**GGG**AGTCTCCGGTGGACTGCAGCG EXON 3  
 TTAGCAAATGCAGCAAGCTGGTGGGCGGAGGCGAGTCCAACCCCATGAAC  
 TACAACAGCTATATGGACGAGAAGAATGGCCCCCTCCTCCCAACATGAC  
 CACCAACGAGAGGAGAGTCATCGTCCCCGCAG**AG**CCCCACACTGTGGACAC EXON 4  
 AGGAGCATGTGAGGCAATGGCTGGAGTGGGCCATAAAGGAGTACAGCTTG  
 ATGGAGATCGACACATCCTTTTTCCAGAACATGGATGGCAAGGAACTGTG  
 TAAAATGAACAAGGAGGACTTCCTCCGCGCCACCACCCTCTACAACACGG  
 AAGTGCTGTTGTCACACCTCAGTTACCTCAGGGAAAG

## Figure S3. Sequences of FECR1 variants.

- Diagram of the formation of FECR1 V1 (major form). FECR1 V1 is formed by the back splicing between *FLI1* exon 4 and exon 2. The FECR1 back splicing site is marked in red arrow.
- Sequences of FECR1 V1 in the order of *FLI1* exon 4 (red) -exon 2 (blue) -exon 3 (yellow). The FECR1 V1 back splicing site is marked with red arrow. The primer locations (JH2532, JH3273) are marked underline with the arrow indicating the orientation. R: A or G, a single nucleotide polymorphism at the beginning of exon 2.
- Diagram of the formation of FECR1 V2 (minor form). FECR1 V2 is formed by the back splicing between *FLI1* exon 5 and exon 2. The FECR1 back splicing site is marked in red arrow.
- Sequences of FECR1 V2 in the order of *FLI1* exon 5 (green)-exon 2 (blue)-exon 3 (yellow)-exon 4 (red). The FECR1 V2 back splicing site is marked bold with red arrow. R: A or G (single nucleotide polymorphism).

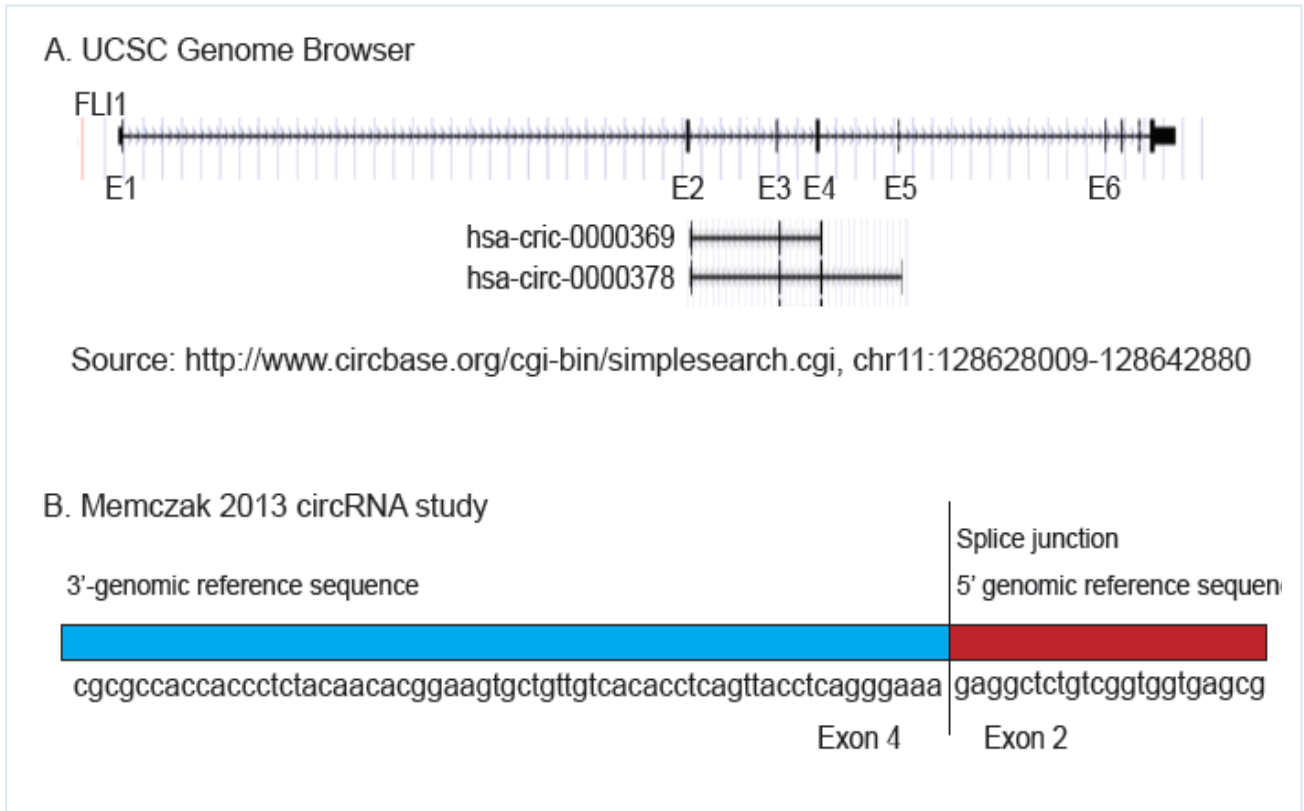

Source: [http://www.circbase.org/cgi-bin/singlerecord.cgi?id=hsa\\_circ\\_0000369](http://www.circbase.org/cgi-bin/singlerecord.cgi?id=hsa_circ_0000369)

**Figure S4. FEER1 from circular RNA database websites.**

- A. Location of FEER1 V1 (hsa-circ-0000369) and V2 (has-circ-0000378) from UCSC genome browser. FEER1 V1 (hsa-circ-0000369) is composed of *FLI1* exons 4-2-3. FEER1 V2 (has-circ-0000378) is composed of *FLI1* exons 5-2-3-4.
- B. The splicing junction sequence of FEER1 V1 (has-circ-0000369). The FEER1 V1 splicing junction site contains exon 4 (blue) and exon 2 (red).

### A. FECR1 circular RNAs

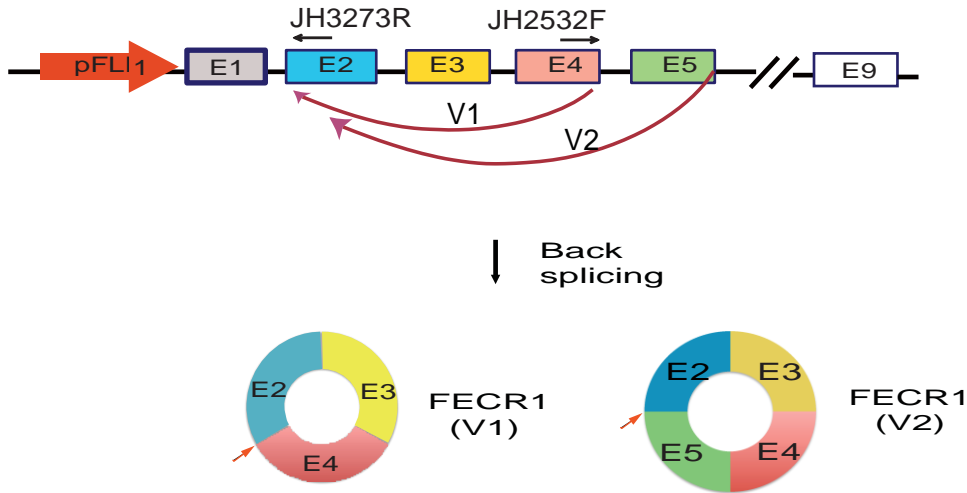

### B. FECR1 sequencing

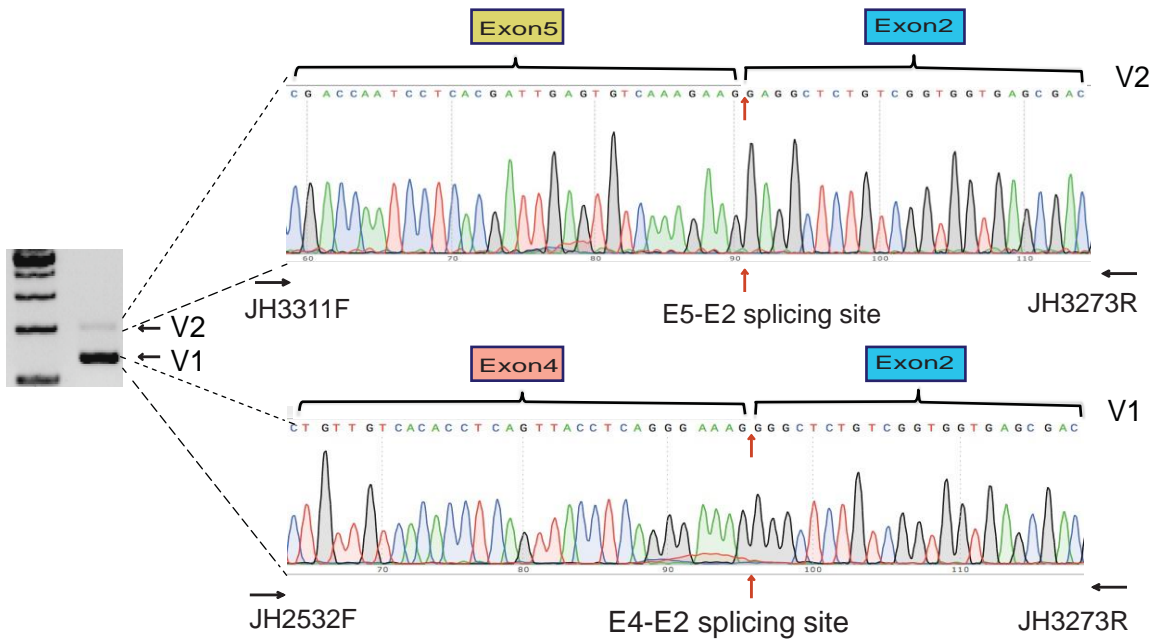

**Figure S5. Sequencing of Fli1 circle RNAs.**

- A. Formation of FECR1 V1 and FECR1 V1 by the back splicing between *FLI1* exon 4 and exon 2, and exon 5 and exon 2, respectively. The FECR1 beck slicing site is marked in red arrow.
- B. Sequencing of FECR1 variants. Red arrow indicates the site of back splicing between exon 5 and exon 2 for V2, and exon 4 and exon 2 for V1. Note the presence of a single nucleotide polymorphism (GGG vs GAG) at the beginning of exon 2 between V1 and V2.

### A. Cell invasion in the rescue assay

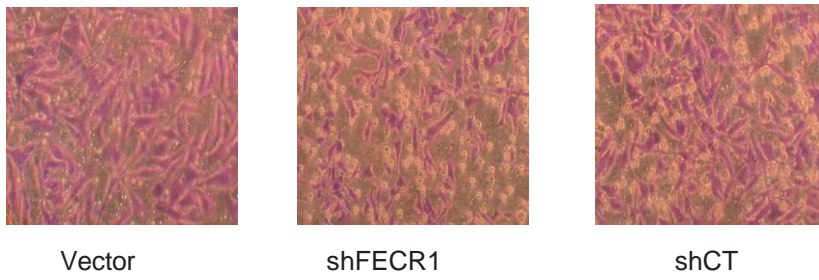

### B. Quantitation

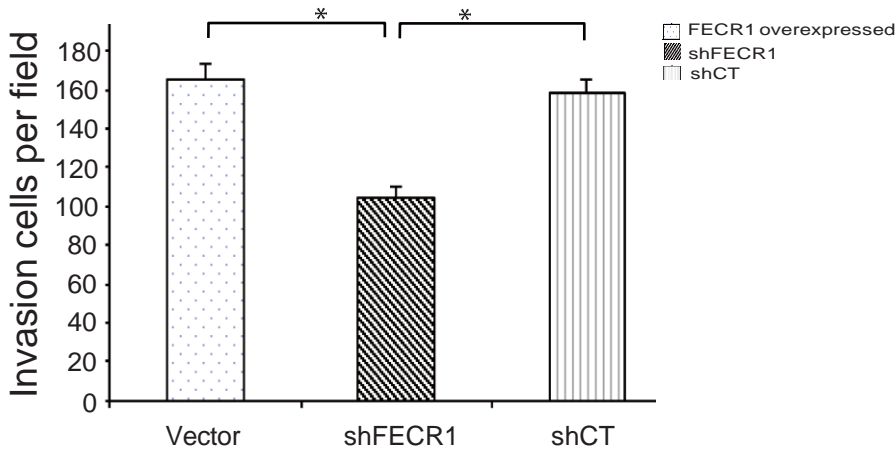

### Figure S6. FECR1 knockdown inhibited cell invasion in MDA-MB231 cells.

- A. Images of cell invasion. FECR1 was knocked down by FECR1-shRNA lentivirus (shFEER1) in the FECR1-overexpressing cells. Control cells were transfected by lentivirus carrying the shRNA control (shCT) or the lentiviral vector (Vector). Cells that crossed through the collagen-coated membrane of the transwell were stained and photographed.
- B. Quantitation of invaded cells. Cells on the lower surface of the membrane were stained with the crystal violet and cells per field were counted. All data shown are mean ± SEM from three independent experiments. \*  $p < 0.01$  as compared with the shCT control and vector groups.

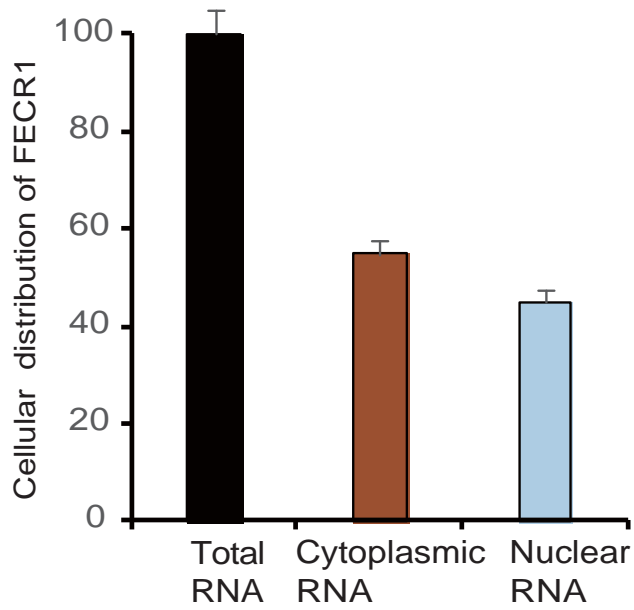

**Figure S7. Cellular distribution of FECR1 circRNA.**

RNAs were extracted from total cell, cytoplasm, and nuclei fractions. After reverse transcription, quantitative PCR was used to quantitate FECR1 abundance in each fraction. For comparison, the FECR1 circRNA in total cells was set as 100. All data shown are mean ± SEM from three independent experiments.

A. FECR1 circular RNA

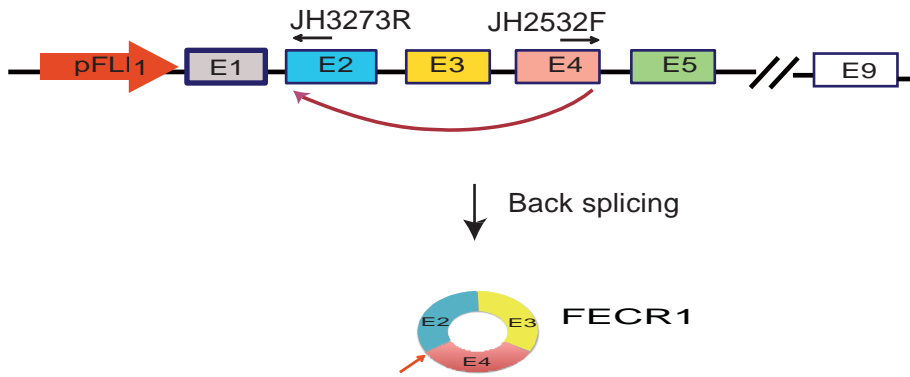

B. FECR1-specific RAT primer

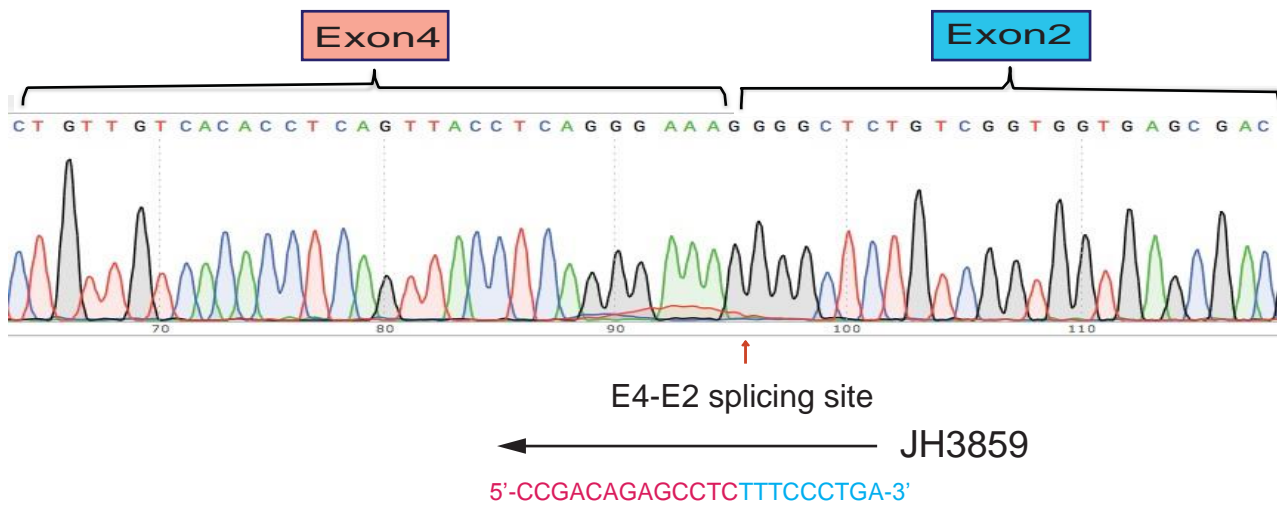

**Figure S8. Location of the FECR1-specific RAT primer.**

- A. Diagram of FECR1 V1. FECR1 V1 is formed by the back splicing between *FLI1* exon 4 and exon 2. The FECR1 back splicing site is marked in red arrow.
- B. Location of primer JH3859. The primer is composed of DNA sequence from exon 4 (red) and exon 2 (blue). The FECR1 back splicing site is marked in red arrow.



## A. FECR1 genome binding

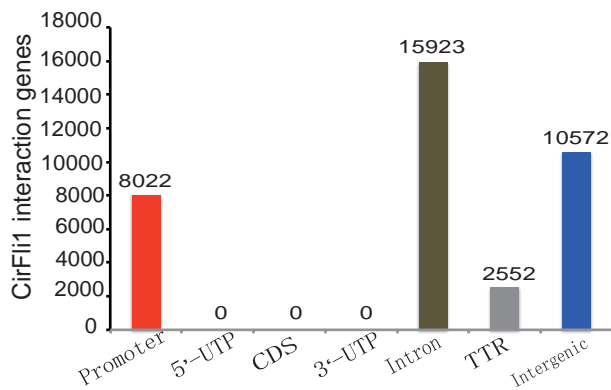

## B. FECR1 binding sites (%)

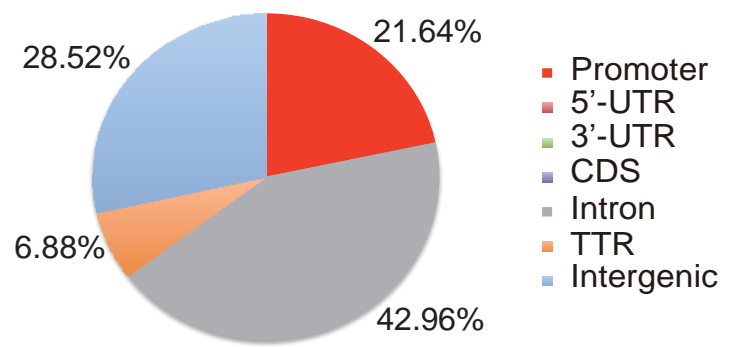

## C. Pathways

Hippo signaling  
 Glycogen degradation II  
 Cleavage and polyadenylation of pre-mRNA  
 Glycogen Degradation III  
 Regulation of eIF4 and p70S6K signaling  
 EIF2 signaling  
 Antiproliferative Role of TOB in T cell signaling

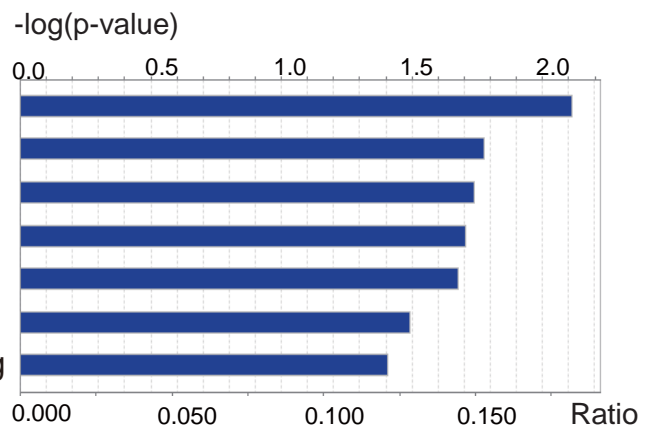

## D. Motifs

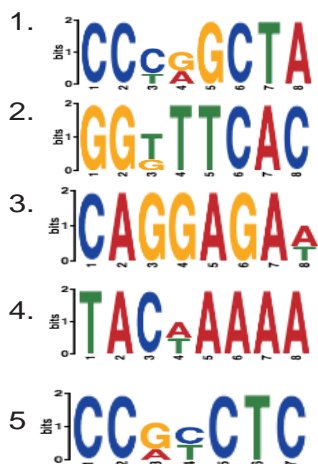

## E. Circos plot

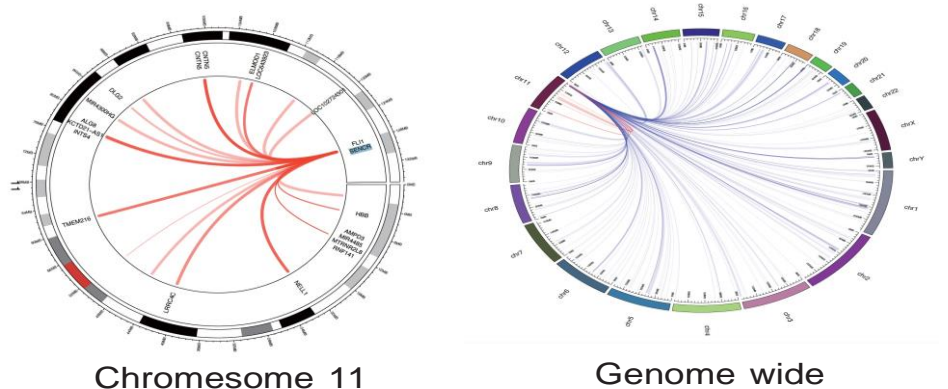

## Figure S9. FECR1 binding by RAT-Seq.

- Location of FECR1 binding in the genome. Most of FECR1 binding targets are located in gene promoters, introns, and intergenic regions.
- Specific distribution (%) of FECR1 binding in the coding genes.
- Gene ontology analysis of FECR1 target gene pathways. Bars: p-values of Fischer's exact test; squares (yellow): the ratio that represents the number of differentially expressed genes in a given pathway divided by total number of genes that make up that canonical pathway.
- Consensus binding motifs of FECR1.
- The Circos plot of FECR1 binding sites. In addition to the binding in chromosome 11, where the *FLI1* gene is located, FECR1 also binds to targets in other chromosomes.

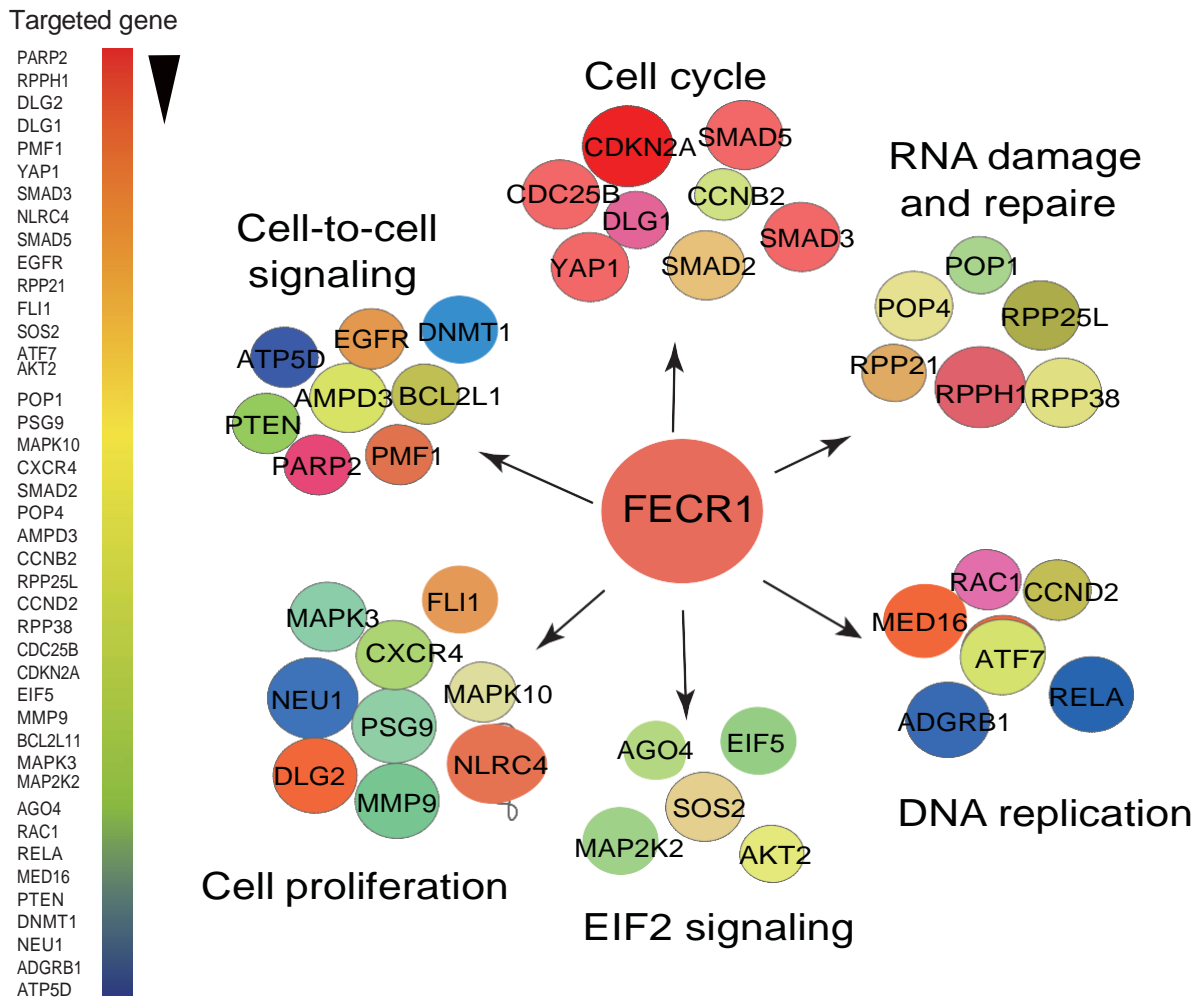

**Figure S10. The chromatin RAT interactome of the FECR1 circRNA.**

The top pathway binding genes were listed according to their enrichment value (FPKM).

A. *FLI1* promoter

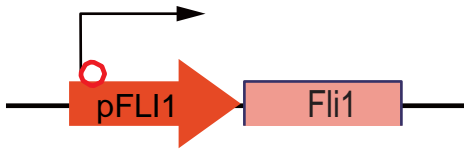

B. FECR1 binding sequences in the *FLI1* promoter (CpG islands)

AGAGAGAGAGAGAGAGAGAGAGAGAGAGAGAGAGAGAGAGAGATAGGA  
 CTTCTCCCGATTCGCAAAGTGAAGTCACTTCCCAAATTAGCTGAAAA  
 AAAAGTTTCATCCGGTTAACTGTCTCTTTCGCTCCGCTACAACAACAAAC  
 GTGCACAGGGGAGTGAGGGCAGGGCGCTCGCAGGGGGCACGCAGGGAGGG  
 CCCAGGGCCAGGGAGGC CGCGC CGGGCTAATCCGAAGGGGCTGCGAGG  
 TCAGGCTGTAACCGGGTCAATGTGTGGAATATTGGGGGGCTCGGCTGCAG  
 ACTTGCCAAATGGACGGGACTATTAAGgtaagcgcggggcaa<sup>Exon 1</sup>cgga<sup>Exon 1</sup>  
<sup>Exon 1</sup>cggg<sup>Exon 1</sup>cg<sup>Exon 1</sup>cggggac<sup>Exon 1</sup>cggc<sup>Exon 1</sup>cg<sup>Exon 1</sup>gggagg<sup>Exon 1</sup>cg<sup>Exon 1</sup>aag<sup>Exon 1</sup>cg<sup>Exon 1</sup>g<sup>Exon 1</sup>cg<sup>Exon 1</sup>gg<sup>Exon 1</sup>cg<sup>Exon 1</sup>gtaggtg<sup>Exon 1</sup>cg<sup>Exon 1</sup>  
<sup>Exon 1</sup>ggg<sup>Exon 1</sup>cc<sup>Exon 1</sup>cg<sup>Exon 1</sup>cg<sup>Exon 1</sup>tcc<sup>Exon 1</sup>cg<sup>Exon 1</sup>gaaga<sup>Exon 1</sup>cg<sup>Exon 1</sup>tggcctctctcccttccctc<sup>Exon 1</sup>cg<sup>Exon 1</sup>cg<sup>Exon 1</sup>ccc<sup>Exon 1</sup>cg<sup>Exon 1</sup>  
<sup>Exon 1</sup>gctt<sup>Exon 1</sup>cg<sup>Exon 1</sup>cg<sup>Exon 1</sup>c<sup>Exon 1</sup>cg<sup>Exon 1</sup>gctcctc<sup>Exon 1</sup>cg<sup>Exon 1</sup>g<sup>Exon 1</sup>ct<sup>Exon 1</sup>cg<sup>Exon 1</sup>ggtgg<sup>Exon 1</sup>cg<sup>Exon 1</sup>agtcctact<sup>Exon 1</sup>cg<sup>Exon 1</sup>cg<sup>Exon 1</sup>ggc<sup>Exon 1</sup>  
<sup>Exon 1</sup>cagc<sup>Exon 1</sup>cg<sup>Exon 1</sup>gccagg<sup>Exon 1</sup>cg<sup>Exon 1</sup>cc<sup>Exon 1</sup>cg<sup>Exon 1</sup>cattgagg<sup>Exon 1</sup>cg<sup>Exon 1</sup>accctcccc<sup>Exon 1</sup>cg<sup>Exon 1</sup>aatcccagc<sup>Exon 1</sup>  
<sup>Exon 1</sup>ccccaaagtggagccc<sup>Exon 1</sup>cg<sup>Exon 1</sup>gccccctcccacct<sup>Exon 1</sup>cg<sup>Exon 1</sup>ctgcc<sup>Exon 1</sup>cg<sup>Exon 1</sup>cg<sup>Exon 1</sup>gggct<sup>Exon 1</sup>  
<sup>Exon 1</sup>gcaggagggga<sup>Exon 1</sup>cg<sup>Exon 1</sup>g<sup>Exon 1</sup>cg<sup>Exon 1</sup>ggaaac<sup>Exon 1</sup>cg<sup>Exon 1</sup>ggggaccccagggt<sup>Exon 1</sup>cg<sup>Exon 1</sup>gaa<sup>Exon 1</sup>cg<sup>Exon 1</sup>gagt<sup>Exon 1</sup>  
<sup>Exon 1</sup>caagg<sup>Exon 1</sup>cg<sup>Exon 1</sup>agagacct<sup>Exon 1</sup>cg<sup>Exon 1</sup>gggtccaccactcccac<sup>Exon 1</sup>cg<sup>Exon 1</sup>acacc<sup>Exon 1</sup>cg<sup>Exon 1</sup>gggctc<sup>Exon 1</sup>  
<sup>Exon 1</sup>cg<sup>Exon 1</sup>tggccccag<sup>Exon 1</sup>cg<sup>Exon 1</sup>ctaggcactgggcttctctc<sup>Exon 1</sup>cg<sup>Exon 1</sup>cagagg<sup>Exon 1</sup>cg<sup>Exon 1</sup>gaaca<sup>Exon 1</sup>  
<sup>Exon 1</sup>cg<sup>Exon 1</sup>cg<sup>Exon 1</sup>gggg<sup>Exon 1</sup>cg<sup>Exon 1</sup>ggggctgcagt<sup>Exon 1</sup>cg<sup>Exon 1</sup>cc<sup>Exon 1</sup>cg<sup>Exon 1</sup>ggct<sup>Exon 1</sup>cg<sup>Exon 1</sup>ggtccctgctggtg<sup>Exon 1</sup>  
<sup>Exon 1</sup>gccctggggtgggtaagtggcct<sup>Exon 1</sup>cg<sup>Exon 1</sup>ttgca<sup>Exon 1</sup>cg<sup>Exon 1</sup>agggtagggtgcaagt<sup>Exon 1</sup>  
<sup>Exon 1</sup>agtgtgt<sup>Exon 1</sup>cg<sup>Exon 1</sup>ggggatctatctgag<sup>Exon 1</sup>cg<sup>Exon 1</sup>ggctcctccagatggaagcccctg<sup>Exon 1</sup>  
<sup>Exon 1</sup>tttacatgtcag<sup>Exon 1</sup>cg<sup>Exon 1</sup>ctttcccttccctct<sup>Exon 1</sup>cg<sup>Exon 1</sup>gcactcagt<sup>Exon 1</sup>cg<sup>Exon 1</sup>cc<sup>Exon 1</sup>cg<sup>Exon 1</sup>gctct<sup>Exon 1</sup>  
<sup>Exon 1</sup>agg<sup>Exon 1</sup>cg<sup>Exon 1</sup>ctggagagc<sup>Exon 1</sup>cg<sup>Exon 1</sup>cc<sup>Exon 1</sup>cg<sup>Exon 1</sup>gctc<sup>Exon 1</sup>cg<sup>Exon 1</sup>cg<sup>Exon 1</sup>ggactcctgggc<sup>Exon 1</sup>cg<sup>Exon 1</sup>gcct<sup>Exon 1</sup>cg<sup>Exon 1</sup>cg<sup>Exon 1</sup>  
<sup>Exon 1</sup>cctctc<sup>Exon 1</sup>cg<sup>Exon 1</sup>g<sup>Exon 1</sup>cg<sup>Exon 1</sup>gggaaccttccccagcccc<sup>Exon 1</sup>cg<sup>Exon 1</sup>tc<sup>Exon 1</sup>cg<sup>Exon 1</sup>cacagatccctagc<sup>Exon 1</sup>  
<sup>Exon 1</sup>gccc<sup>Exon 1</sup>cg<sup>Exon 1</sup>agcccc<sup>Exon 1</sup>cg<sup>Exon 1</sup>ccctt<sup>Exon 1</sup>cg<sup>Exon 1</sup>cg<sup>Exon 1</sup>cctagg<sup>Exon 1</sup>cg<sup>Exon 1</sup>tg<sup>Exon 1</sup>cg<sup>Exon 1</sup>cg<sup>Exon 1</sup>gctccaggacca<sup>Exon 1</sup>  
<sup>Exon 1</sup>gggctcctggagctgt<sup>Exon 1</sup>cg<sup>Exon 1</sup>cctc<sup>Exon 1</sup>cg<sup>Exon 1</sup>aaagggtcctg<sup>Exon 1</sup>cg<sup>Exon 1</sup>tcctt<sup>Exon 1</sup>cg<sup>Exon 1</sup>gagc<sup>Exon 1</sup>cg<sup>Exon 1</sup>  
<sup>Exon 1</sup>cctc<sup>Exon 1</sup>cg<sup>Exon 1</sup>ttg<sup>Exon 1</sup>caggggc<sup>Exon 1</sup>cg<sup>Exon 1</sup>gctgtgagcc<sup>Exon 1</sup>cg<sup>Exon 1</sup>cg<sup>Exon 1</sup>ccc<sup>Exon 1</sup>cg<sup>Exon 1</sup>cg<sup>Exon 1</sup>cc<sup>Exon 1</sup>cg<sup>Exon 1</sup>cc<sup>Exon 1</sup>cg<sup>Exon 1</sup>gcc<sup>Exon 1</sup>  
<sup>Exon 1</sup>attcccaccccagc<sup>Exon 1</sup>cg<sup>Exon 1</sup>cc<sup>Exon 1</sup>cg<sup>Exon 1</sup>ccaagcctgggtctaggttgcaagtgc<sup>Exon 1</sup>  
<sup>Exon 1</sup>aaccag<sup>Exon 1</sup>cg<sup>Exon 1</sup>g

Exon 1

**Figure S11. FECR1 binding sequences in the CpG-rich *FLI1* promoter.**

- A. Location of FECR1 binding in the *FLI1* promoter.
- B. FECR1 binding sequences in the *FLI1* promoter. CpG islands are underlined in red. *FLI1* exon 1 was in blue capital letters and intron 1 was in small black letters.

## A. Location of ChIP primers

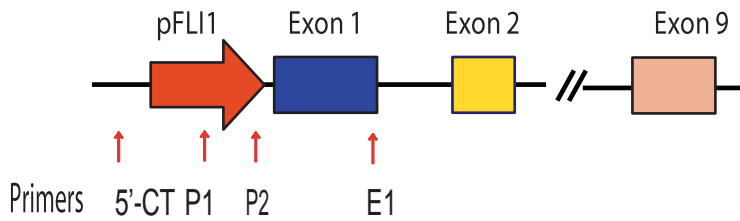

## B. TET1 ChIP qPCR

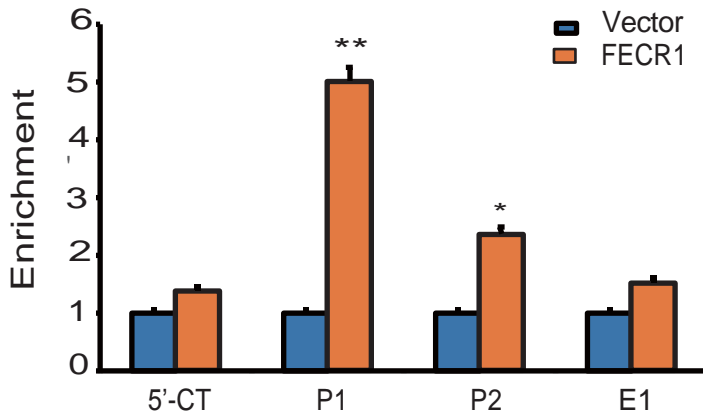

**Figure S12. FECR1 enhances the binding of TET1 to the *FlI1* promoter.**

- A. Location of TET1 ChIP PCR primers. 5'-CT: 5'-upstream control site; P1-P2: *FLI1* promoter; I1-I3: intron control regions.
- B. FECR1 enhances the binding of TET1 to the *FLI1* promoter. MDA-MB231 cells were transfected with FECR1 and vector lentiviruses. After puromycin selection, cells were collected for immunoprecipitation using an antibody against TET1. PCR was used to compare the enrichment of TET1 between the FECR1-overexpressing and vector control cells. The qPCR data were adjusted over the input and were further standardized over the IgG control. For comparison, the vector control value was set as 1 for each site in the *FLI1* locus. Note the enhanced binding of TET1 in the *FLI1* promoter (P1, P2) in FECR1-overexpressing cells.

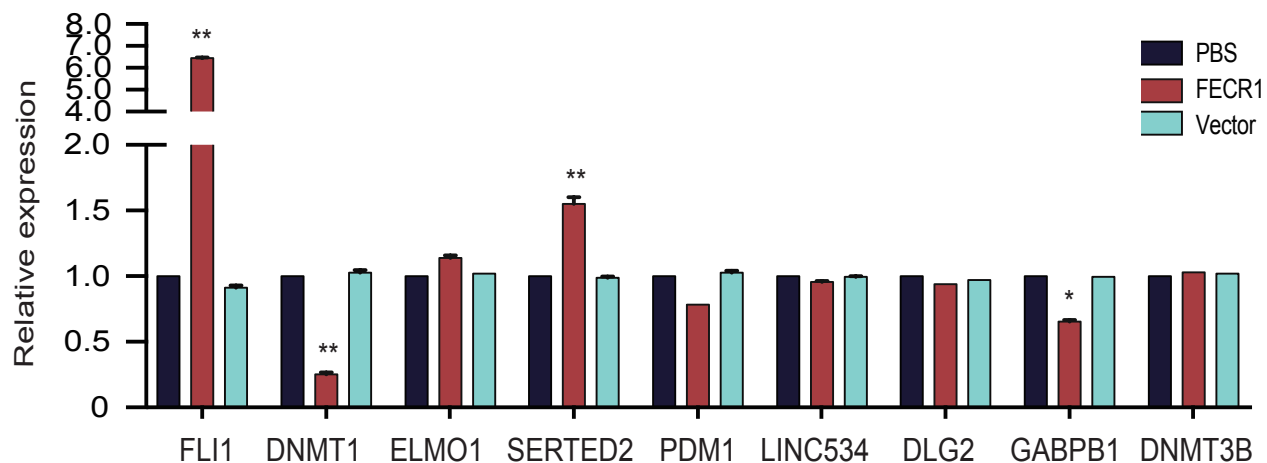

**Figure S13. Expression of target genes in FECR1-overexpressing cells.**

The mRNA abundance of FECR1 target genes were quantitated by real-time PCR. All data shown are mean±SEM from three independent experiments. \* p<0.01 as compared with the PBS control and vector control groups.
