# Supplementary material for: A novel FLI1 exonic circular RNA promotes metastasis in breast cancer by coordinately regulating TET1 and DNMT1
Source: PubMed Central journal article supplement (PMC6290540; doi:10.1186/s13059-018-1594-y), 2018-12-11
Supplement: 13059_2018_1594_MOESM2_ESM.pdf [file 13059_2018_1594_MOESM2_ESM.pdf]

**Table S1. Oligonucleotide primers used for PCR**

| <b>ID</b>                           | <b>Oligo Name</b> | <b>Oligo sequence</b>      | <b>Product size</b> |
|-------------------------------------|-------------------|----------------------------|---------------------|
| <b><i>RT-PCR</i></b>                |                   |                            |                     |
| FLI (exon 2-3)                      | JH2530            | TGACCACCAACGAGAGGAGAGTC    | 156bp               |
|                                     | JH2531            | TACACAGTTCCTTGCCATCCATG    |                     |
| FLI1 (exon 4-6)                     | JH2532            | CTGTTGTCACACCTCAGTTAC      | 144bp               |
|                                     | JH2533            | CATGTTATTGCCCAAGCTCCTC     |                     |
| FEER1                               | JH3273            | AGTCAGGACTCCCCGAGGCAGT     | 137bp               |
|                                     | JH2532            | CTGTTGTCACACCTCAGTTAC      |                     |
| FEER1                               | JH3859            | CCGACAGAGCCTCTTTCCCTGA     | 253bp               |
|                                     | JH2530            | TGACCACCAACGAGAGGAGAGTC    |                     |
| DNMT1                               | JH3540            | GTCACCAACCCCGAGCCCATGG     | 193bp               |
|                                     | JH3541            | CCAARGCCAATGGCTTTGGCCAG    |                     |
| $\beta$ -Actin                      | J880              | CAGGTCATCACCATTGGCAATGAGC  | 135bp               |
|                                     | J881              | CGGATGTCCACGTCACACTTCATGA  |                     |
| GABPB1                              | JH4273            | CCAGCTAAGAGACAATGTATCGA    | 159bp               |
|                                     | JH4274            | GTAGGCCTCTGCTTCCTGTTCT     |                     |
| SERTAD2                             | JH4277            | CGTTAGTTCAGGTGGAGCT        | 128bp               |
|                                     | JH4278            | AGACACCTTGGATGGACCGTCA     |                     |
| DPM1                                | JH4279            | GGGATGTTGCTGAACAGTTGGA     | 157bp               |
|                                     | JH4280            | TGGTGTGAGAGATCAGCATCCAT    |                     |
| ELMO1                               | JH4283            | TTGCACTCCAGCATGCCGATAG     | 146bp               |
|                                     | JH4284            | CATACTCGAGGACTGGATTTCGT    |                     |
| DLG2                                | JH4500            | AGTCGGGTTGCTTGGAATGCA      | 139bp               |
|                                     | JH4501            | CACGCCCTCTTGTACTCTCTCT     |                     |
| LINC00534                           | JH4496            | GAGCCATTGCCTCTTGCTGTGA     | 151bp               |
|                                     | JH4497            | CTGGAAAGGGAGTGGAAGTGTGA    |                     |
| DNMT3B                              | JH069             | GCCCCAA TCCTGGAGGCTAT      | 116bp               |
|                                     | JH070             | CGCCTGTCAAGTCCTGTGTGTA     |                     |
| circPVT1                            | NF063             | CFACTCTTCCTGGTGAAGCATCTGAT | 134bp               |
|                                     | NF064             | TACTTGAACGAAGCTCCATGCAGC   |                     |
| Spike-in DNA                        | JH1695            | CGAGTACAAGCCCACGGTGC       | 124bp               |
|                                     | JH1696            | GATGTGGCGGTCCGGATCGACG     |                     |
| <b><i>DNA methylation</i></b>       |                   |                            |                     |
| CpG1-2                              | JH5040            | AGGTGATGGGGGGAGGTTTAGAT    | 242bp               |
|                                     | JH5041            | ACCCCTCTTCCTCCCCTACTAA     |                     |
| CpG3-5                              | JH5044            | GTGTATAGGGGAGTGAGGGT       | 285bp               |
|                                     | JH5045            | ACCCCCAATATTCCACACATTA     |                     |
| <b><i>FLI1 promoter binding</i></b> |                   |                            |                     |
| 1                                   | JH4053            | CTCGGTTTTTCGTCCGAGTCTTC    | 119bp               |
|                                     | JH4054            | TTTTTCCAGCCGGAGACAAACT     |                     |
| 2                                   | JH2756            | GGGCTGCGAGGTCAGGCT         | 106bp               |
|                                     | JH4528            | GTTGCCCCGCCGCTTACCTTA      |                     |

|   |        |                        |       |
|---|--------|------------------------|-------|
| 3 | JH4531 | CTCTCCGCAGAGGCGGAACA   | 104bp |
|   | JH4532 | CTCGTGCAACGAGGCCACTTA  |       |
| 4 | JH2528 | AGGGAGCTATAAGAGCCTAT   | 163bp |
|   | JH2529 | GAGACACTTGCATGAACACATC |       |
| 5 | JH2657 | GAACCTGACACTTCAGGCCA   | 120bp |
|   | JH2758 | AGGTAAGTTAGGTGAATGAC   |       |
| 6 | JH2744 | CTTTTGGGAATGGGCATAC    | 269bp |
|   | JH2745 | TCCATTCCCTAACCTGCGT    |       |
| 7 | JH3222 | GCAAGTGGTTCTCATGGAAGC  | 126bp |
|   | JH3223 | ATGAGCCACCCAGTCTATGGTA |       |

---

**Cas9-IP gRNA**

|         |                        |
|---------|------------------------|
| 1       | GATGAGTGGGTGAGCCGCTC   |
| 2       | GTGGACCCCGTCATTGTTCCCG |
| control | GTTCCCTGCAAGAGTGCCCA   |

---

**RAT  
primers**

**FEER1** AGTCCCTTTCTCCGAGACAGCC

**RAT control**

JH5849 ATGGACTGATGATCTTATGC  
JH5850 TACATAGTAGATCAGATACT

---
